# Supplementary material
Source: MDPI journal article supplement (https://www.mdpi.com/2673-4605/14/1/60)
Supplement: s1 [file s1]

# Ultraviolet (UV) Spectrophotometric Analysis of Ketoprofen in Tablets. Statistical Validation of Proposed Method

Affiliation 1: Biomedical Sciences Department, Faculty of Medical Bioengineering, University of Medicine and Pharmacy GRIGORE T. POPA, UMF, Iasi, Romania, ccgavat70@yahoo.com

Cristian Catalin Gavat<sup>1</sup>

Abstract: The aim was to exactly quantify the amount of pure ketoprofen of a pharmaceutical by a new, developed ultraviolet (UV) spectrophotometric method. The maximum absorption wavelength was determined to be at  $\lambda = 254$  nm for a ketoprofen alcoholic standard solution of 1.4  $\mu\text{g/mL}$ . The applied method was statistically validated. The amount of pure ketoprofen assigned on the pharmaceutical tablet was found to be 146.326 mg ketoprofen/tablet. This obtained value was very close to the official declared content of active substance (150 mg pure ketoprofen/tablet), with an average percentage deviation of 2.45 %, below the maximum value ( $\pm 5$  %).

Keywords: ultraviolet (UV) spectrophotometric method; to exactly quantify; the amount; pure ketoprofen; pharmaceutical tablet; the applied method; official declared content; active substance; average percentage deviation.

Calculation procedure of Ketoprofen studied sample has consisted in the following stages according to Ketoprofen :

1. Calculation of sample solution concentration  $C_s$  ( $\mu\text{g/mL}$ ) from the regression line described in Figure 1: from the calibration graph  $y + 0.005 x + 0,1196$ , whereas  $y = A_s = 0.398$  = sample solution absorbance has resulted  $x$  = sample solution concentration  $C_s$  ( $\mu\text{g/mL}$ ) =  $(0.398 - 0.1196) / 0.005 = 55.68$  ( $\mu\text{g/mL}$ ). Thus,  $C_s$  ( $\mu\text{g/mL}$ ) = 55.68 ( $\mu\text{g/mL}$ ).
2. Quantitative analysis of pure Ketoprofen from the pharmaceutical tablets was assigned as follows: the amount of pure Ketoprofen from the volume  $V_T = 10$  mL graduated glass test tube containing the sample solution was found to be  $X = C_s$  ( $\mu\text{g/mL}$ ) x  $V_T = 55.68 \times 10 = 556.8$   $\mu\text{g}$ . So,  $X = 556.8$   $\mu\text{g}$  of pure Ketoprofen from  $V_T = 10$  mL graduated glass test tube.
3. The amount of pure Ketoprofen in the initial volume  $V_s = 50$  mL of sample solution was:  $X_1 = (V_s \cdot X) / v_s = (50 \cdot 556.8) / 1.9 = 14652.63$   $\mu\text{g}$ .  $X_1 = 14652.63$   $\mu\text{g}$  pure Ketoprofen from  $V_s = 50$  mL sample solution.
4. The amount of pure Ketoprofen on pharmaceutical tablet was found to be:  $Y = (m_T \cdot X_1) / a = (0.5113 \cdot 146523.63) / 0.0512 = 146325.97$   $\mu\text{g}$  pure Ketoprofen / pharmaceutical = 146.326 mg pure Ketoprofen / pharmaceutical tablet. Thus,  $Y = 146.326$  mg pure Ketoprofen / pharmaceutical. tablet was the final result. The official declared amount of pure Ketoprofen on pharmaceutical tablet, by manufacturing company was 150 mg ketoprofen / tablet. The calculated value assigned to 146.326 mg pure Ketoprofen / pharmaceutical tablet. has represented 97.55% from the official declared content of pure Ketoprofen, set out by the producing pharmaceutical company. The mean percentage deviation was only 2.45 % from the official declared amount (150 mg) of active substance. All the statistical parameters of the regression line were calculated in Microsoft Excel 2019 and described in Table 1 and Table 2. (Data → Data Analysis → Regression → Regression Statistics).

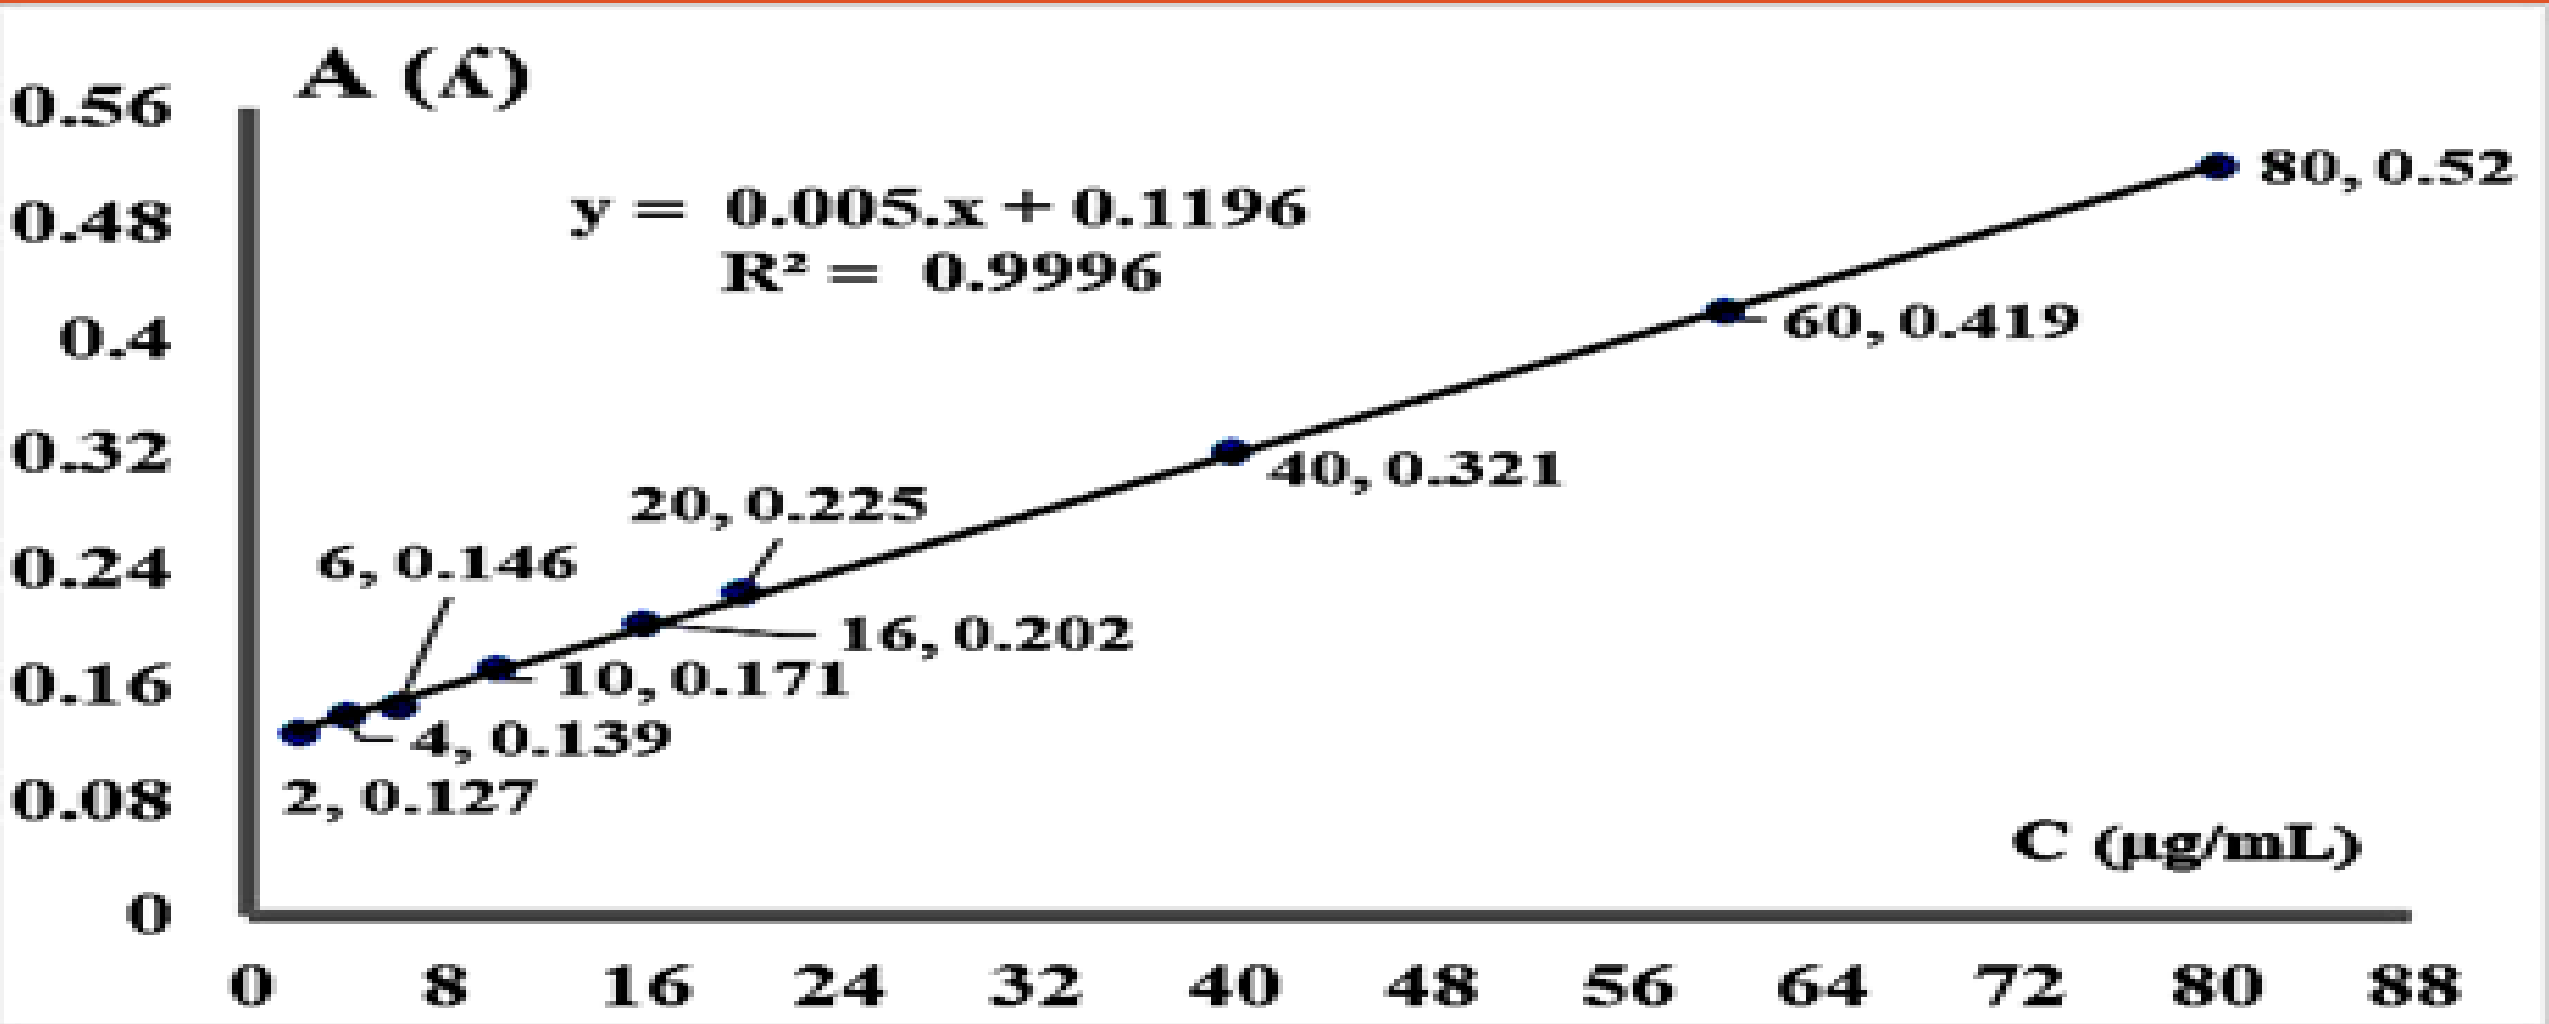

Figure 1. Calibration graph designed for Ketoprofen standard solutions (2.0  $\mu\text{g/mL}$  – 80.0  $\mu\text{g/mL}$ ) at  $\lambda = 254$  nm, against absolute methanol as a blank )

Table 1. Statistical Values of Linear Regression Parameters. and Descriptive Statistics

| Regression statistics                                    | Statistical values | Ae ( $\lambda$ ) | Ce ( $\mu\text{g/mL}$ ) |
|----------------------------------------------------------|--------------------|------------------|-------------------------|
| Multiple R (Correlation coefficient)                     | 0.999816           | 0.127            | 2.0                     |
| Mean                                                     | 0.252222           | 0.139            | 4.0                     |
| Median                                                   | 0.202              | 0.146            | 6.0                     |
| Confidence Level (95.0 %) of Absorbances                 | 0.106611           | 0.171            | 10.0                    |
| R square, R <sup>2</sup> (Linear Regression coefficient) | 0.999631           | 0.202            | 16.0                    |
| Sample variance                                          | 0.019237           | 0.225            | 20.0                    |
| Adjusted R Square R <sup>2</sup>                         | 0.999579           | 0.321            | 40.0                    |
| Standard Deviation (SD)                                  | 0.138696           | 0.419            | 60.0                    |
| Standard Error (SE) of the Regression Line               | 0.002847           | 0.520            | 80.0                    |
| Standard Error of Measured Absorbances                   | 0.046232           | Count:           | 9.0                     |

Table 2/ Concentration of the sample and the amounts of Pure Ketoprofen calculated Pharmaceutical tablet

| Sample Absorbance ( $A_s$ ) | Sample $C_s$ ( $\mu\text{g/mL}$ ) | mg pure Ketoprofen/ Tablet       |
|-----------------------------|-----------------------------------|----------------------------------|
| 0.398                       | 55.68                             | 146.326                          |
| Covariance P = 3.408790     | Percentage Content: 97.55%        | Mean Percentage Deviation: 2.45% |

**Chemical reagents and equipment.** Ketoprofen stock solution 1000  $\mu\text{g/mL}$  (0.1%) prepared from ketoprofen crystalline pure standard powder (Merck <sup>®</sup>), dissolved in absolute methanol as solvent; ketoprofen working solution 200  $\mu\text{g/mL}$ , directly obtained by dilution (1:5) with absolute methanol from the stock solution 1000  $\mu\text{g/mL}$ ; a series of nine pure standard ketoprofen solutions with concentrations that range between 2.0  $\mu\text{g/mL}$  – 80  $\mu\text{g/mL}$ , obtained from the working 200  $\mu\text{g/mL}$  ketoprofen solution; analyzed sample solution obtained in absolute methanol from the tablets of a pharmaceutical; CECIL CE 3200 UV-VIS Spectrophotometer provided with four quartz tubs.*The design of UV absorption spectrum and determination of the maximum absorption wavelength of a pure ketoprofen standard solution:* the absorption spectrum was plotted and maximum absorbance wavelength was determined to be at  $\lambda = 254$  nm, for a ketoprofen pure standard solution of  $C_e = 1.4$   $\mu\text{g/mL} = 0.00014\%$  = 1,4  $\cdot 10^{-4}\%$ . Maximum absorbance value corresponding to the wavelength  $\lambda = 254$  nm was  $A = 0.1266$ . Specific absorbance (specific absorptivity coefficient) was calculated:  $a = A / C_e = 0.1266 / 0.00014 = 904.2857$ . Specific absorbance was:  $a = 904.2857$ .

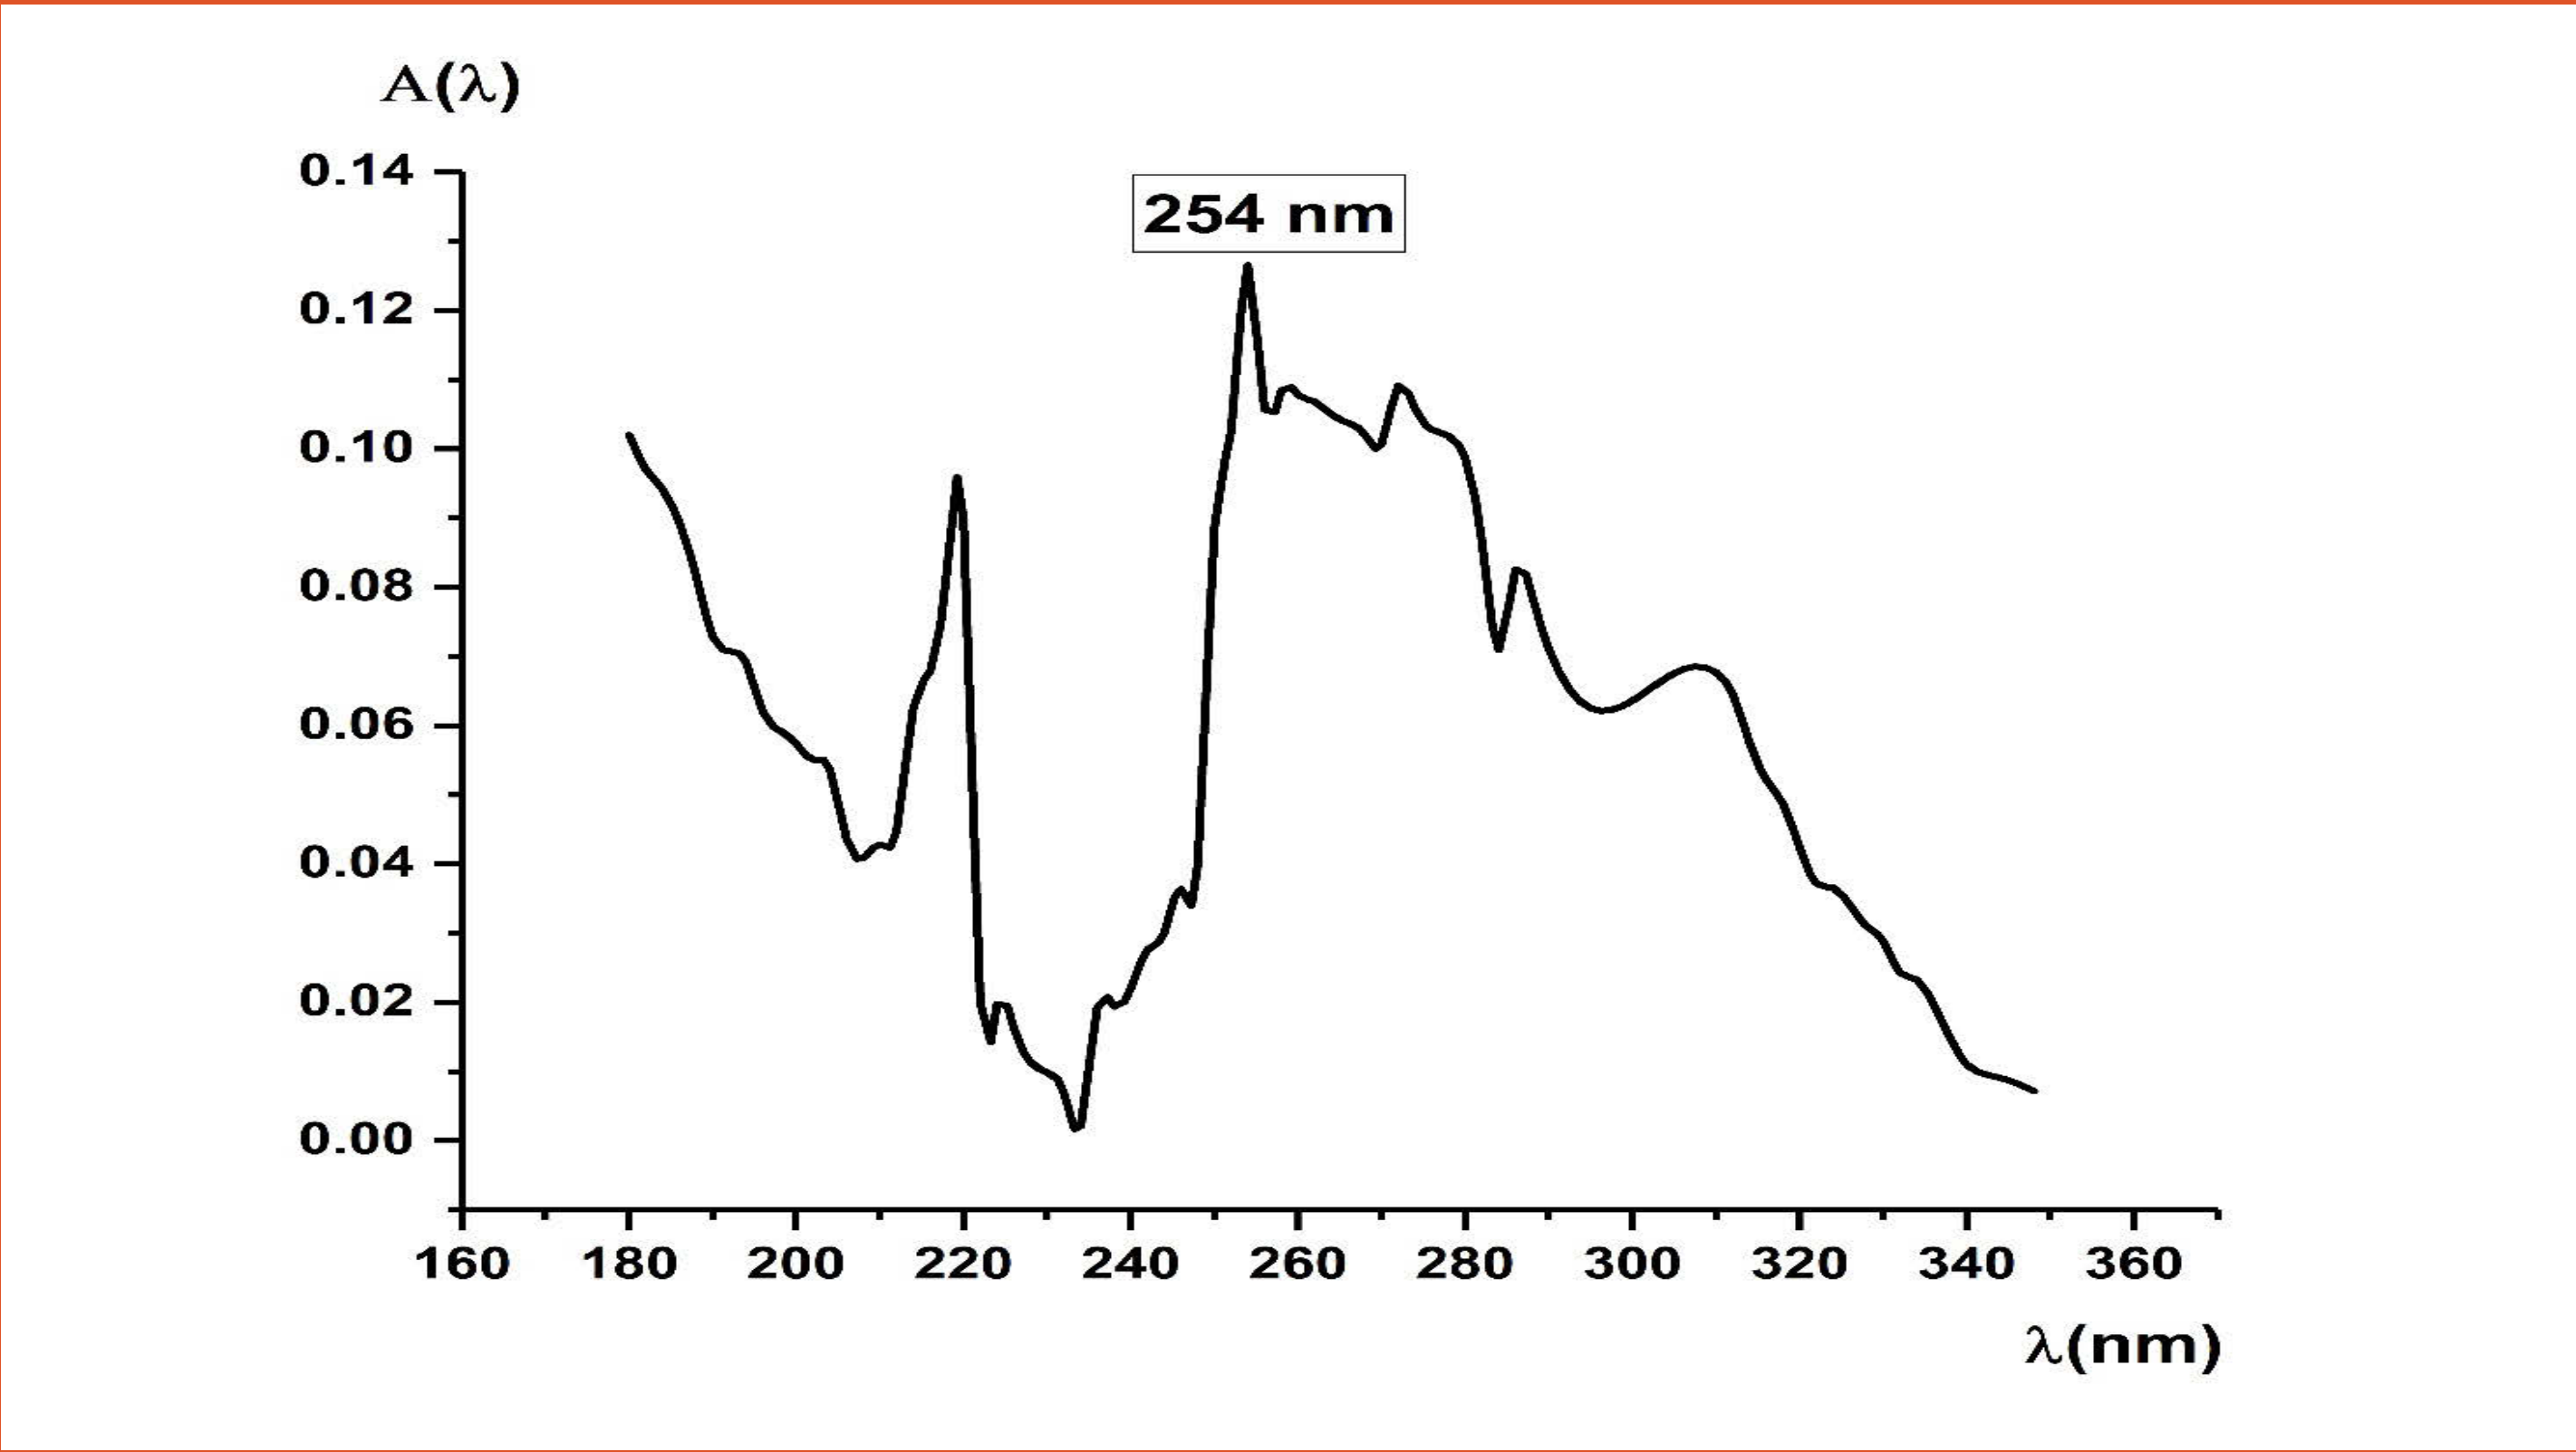

Absorption UV Spectrum of Ketoprofen

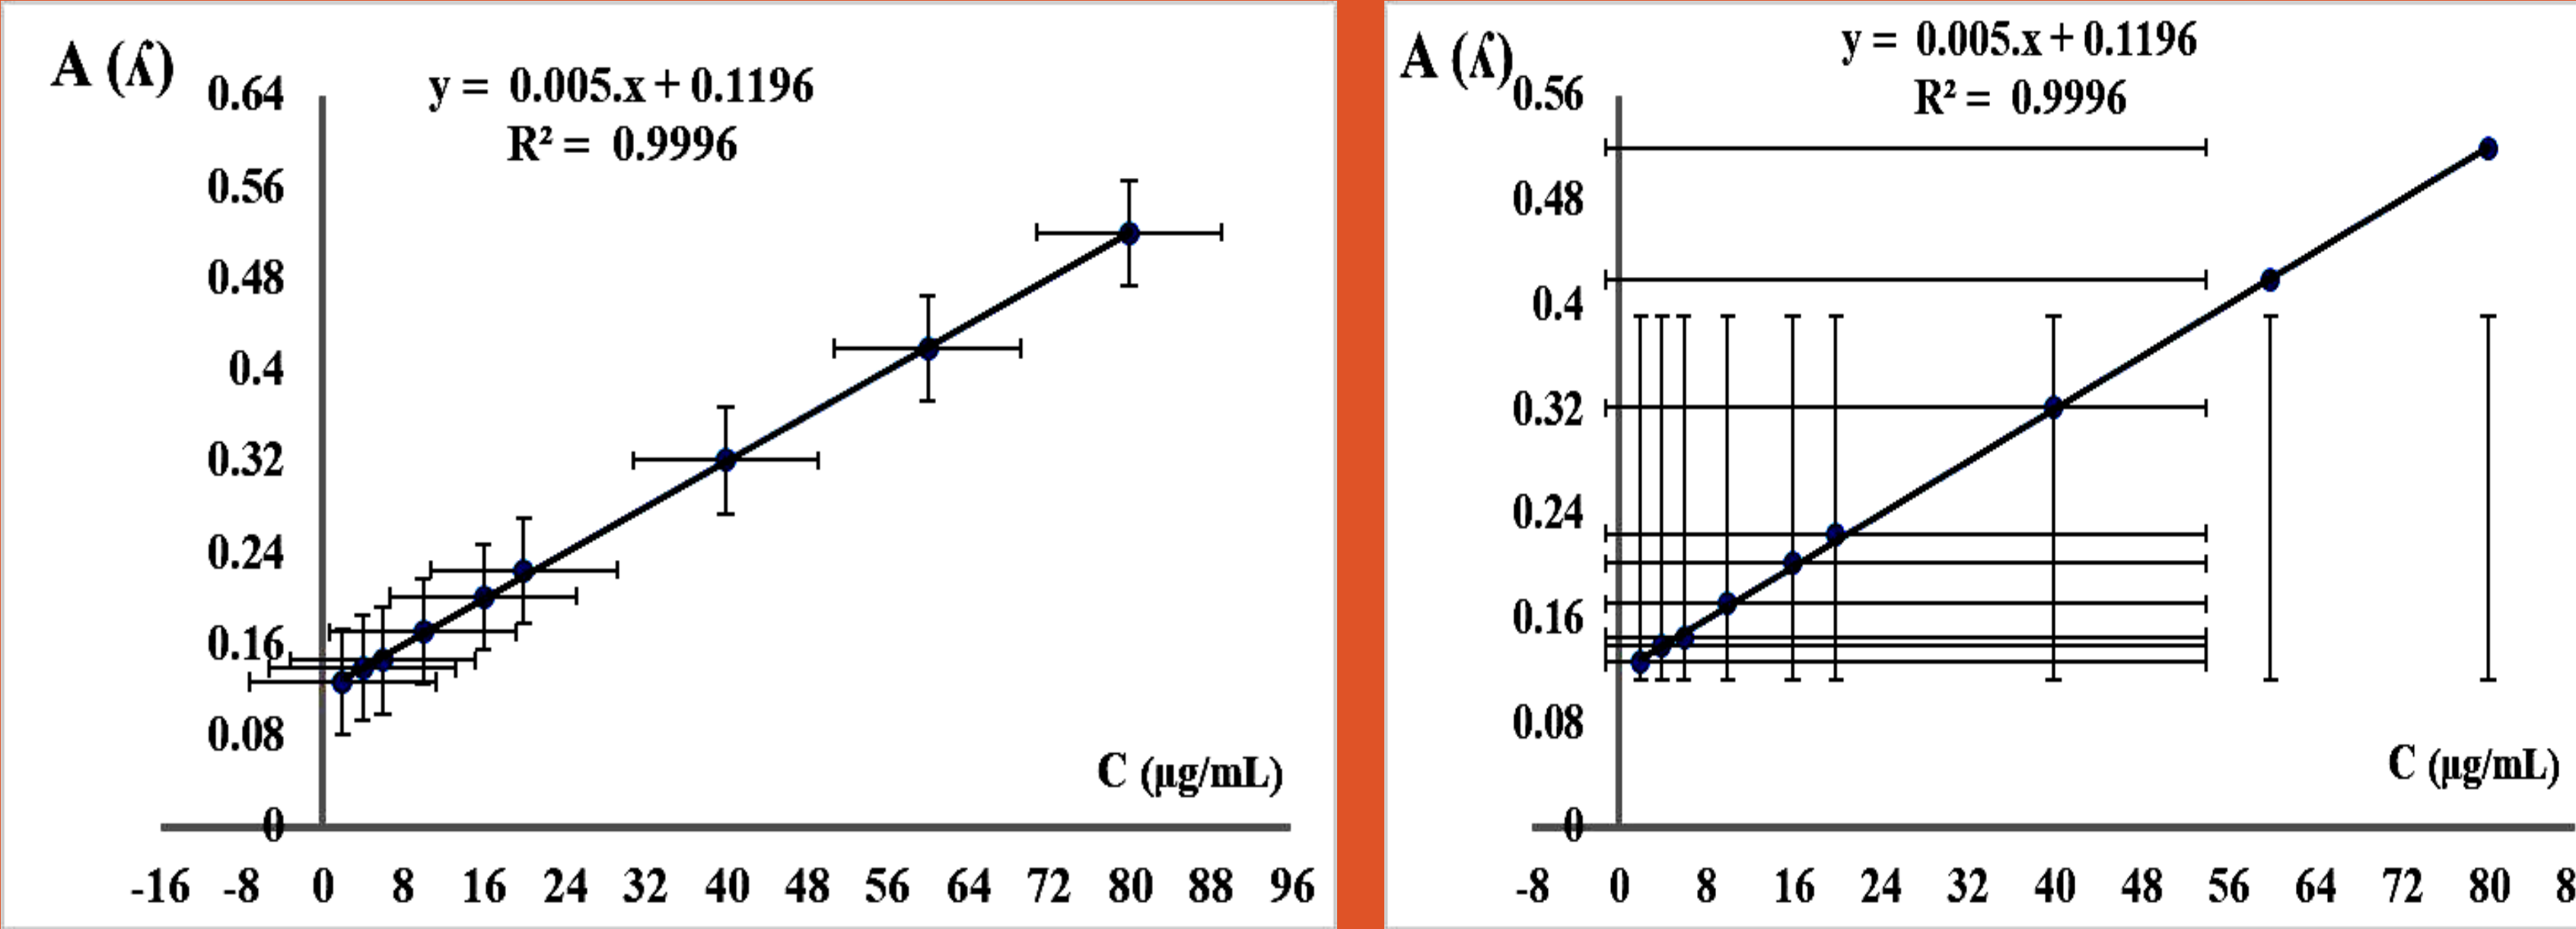

Figure 2. (a) Graphical errors amount: Standard Error (SE) disclosure for the calibration graph of ketoprofen pure standard solutions (2.0  $\mu\text{g/mL}$ - 80.0  $\mu\text{g/mL}$ ); (b) Description of Standard Deviation (s) (SD) of the regression line for ketoprofen pure standard solutions (2.0  $\mu\text{g/mL}$ - 80.0  $\mu\text{g/mL}$ ); Statistically meaning, both, Standard Errors (SE) and Standard Deviations (SD) were found within the normal range of required values , as shown in Table 2:

**Conclusions.** The method applied for Ultraviolet (UV) spectrophotometric analysis of pure Ketoprofen form the tablets of a pharmaceutical presented a very good linearity over the entire chosen concentration range 2.00  $\mu\text{g/mL}$ - 80.0  $\mu\text{g/mL}$ . Regression coefficient was  $R^2 = 0.999631$ .  $R^2 \geq 0.9990$  and correlation coefficient  $R = 0.999816$ .  $R > 0.9990$  were fit perfectly fit within the normal range of values. Standard error of the regression line  $SE = 0.002847$  and the Detection LD and Quantitation limits LQ were reported to be within the normal values  $LD = 1.7082$   $\mu\text{g/mL}$  and  $LQ = 5.694$   $\mu\text{g/mL}$ . Covariance coefficient was 3.408790 and Sample variance was assigned to 0.019237. Both parameters had very small values, below the maximum allowed limit ( $\leq 5\%$ ). The amount of pure Ketoprofen on pharmaceutical tablet was found to be 146.326, mg/ tablet of a pharmaceutical very close to the declared content of active substance (150 mg), with a mean percentage deviation of only 2.45% compared to the official declared value. This percentage was far below the maximum percentage deviation allowed deviation to the declared active substance content ( $\pm 5\%$ ) provided by Romanian Pharmacopeia and by the European and International Pharmacopoeias. So that the studied pharmaceutical product fall perfectly within the limits of normal values provided by these pharmacopoeias.
